# Supplementary material for: A phenothiazine-functionalized pyridine-based AIEE-active molecule: a versatile molecular probe for highly sensitive detection of hypochlorite and picric acid
Source: Royal Society of Chemistry journal article supplement (doi:10.1039/d3ra08451e), 2024-01-01
Supplement: d3ra08451e1.pdf [file d3ra08451e1.pdf]

# "Phenothiazine-Functionalized Pyridine-Based AIEE- Active Molecule: A Versatile Molecular Probe for Highly Sensitive Detection of Hypochlorite and Picric Acid"

Dhandapani vinayagam and Karpagam Subramanian \*

Department of Chemistry, School of Advanced Sciences, Vellore Institute of Technology, Vellore -14, Tamil Nadu, India. Telephone: 91-416-2202334, Fax: 91-416-2243092

\*Corresponding author: \*Email: [skarpagam80@yahoo.com](mailto:skarpagam80@yahoo.com)

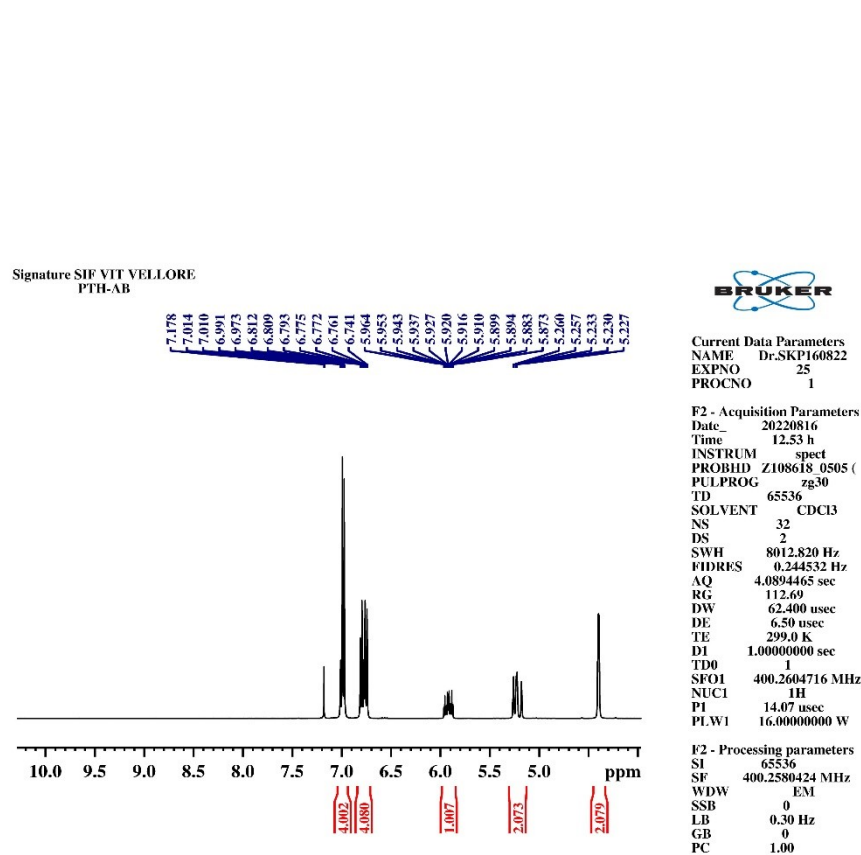

Fig S1. <sup>1</sup>H NMR of PTH-AB in CDCl<sub>3</sub> (400 MHz)

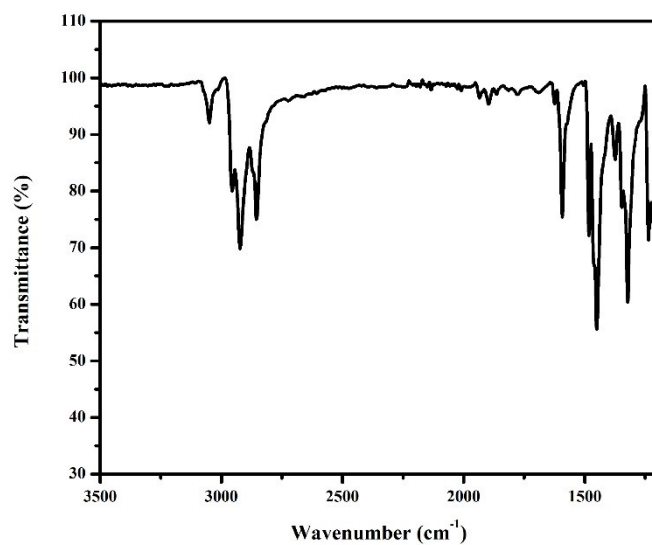

**Fig S2.** FT-IR data of PTH-AB

Signature SIF VIT VELLORE  
PTH-AB-CHO

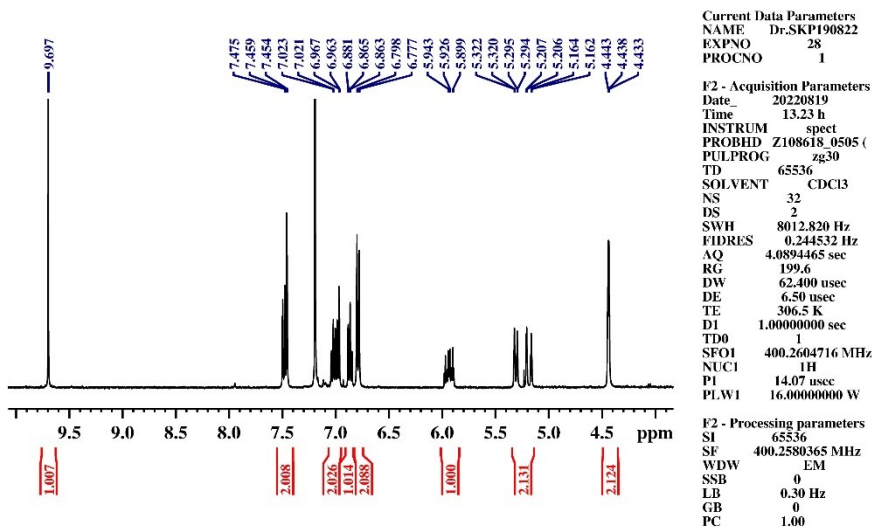

**Fig S3.**  $^1\text{H}$  NMR of PTH-AB-1CHO in  $\text{CDCl}_3$  (400 MHz)

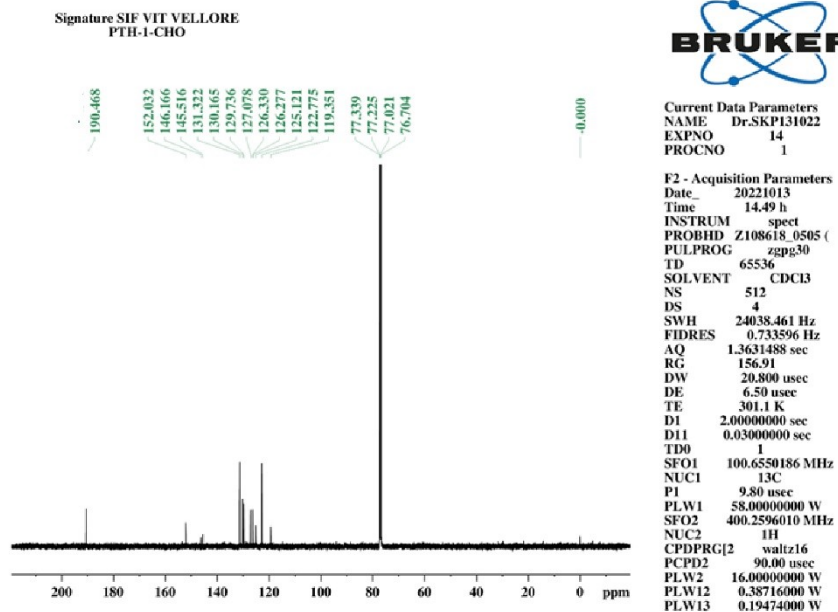

Fig S4.  $^{13}\text{C}$  NMR of PTH-AB-1CHO in  $\text{CDCl}_3$  (400 MHz)

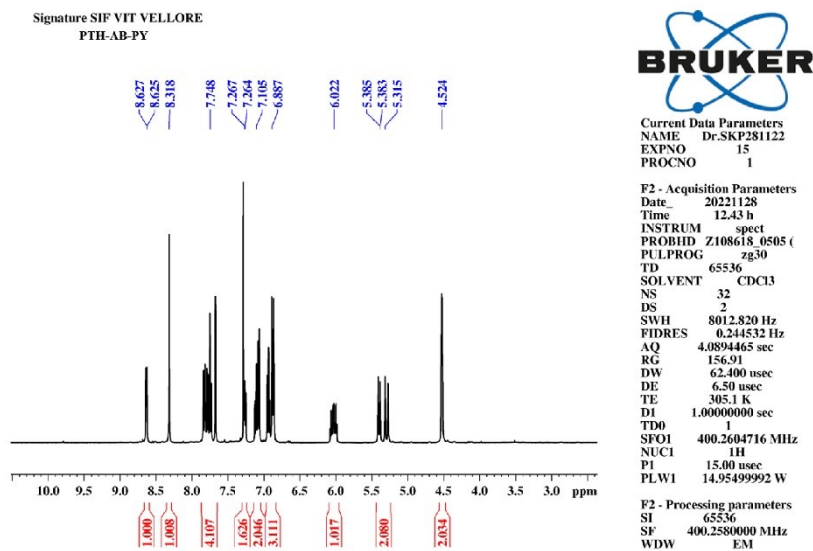

Fig S5.  $^1\text{H}$  NMR of PTH-AB-PY in  $\text{CDCl}_3$  (400 MHz)

Signature SIF VIT VELLORE  
PTH-AB-PY

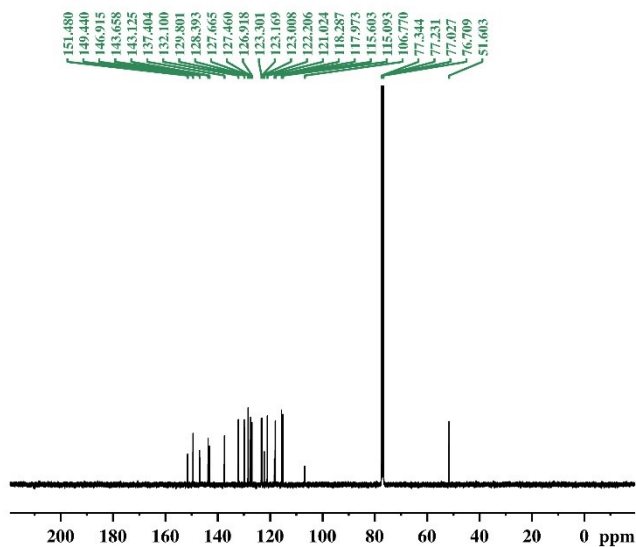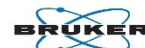

Current Data Parameters  
NAME Dr.SKP281122  
EXPNO 16  
PROCNO 1

F2 - Acquisition Parameters  
Date\_ 20221128  
Time 22.42 h  
INSTRUM spect  
PROBHD Z108618\_0505 ( )  
PULPROG zgpg30  
TD 65536  
SOLVENT CDCl3  
NS 1024  
DS 4  
SWH 24038.461 Hz  
FIDRES 0.733596 Hz  
AQ 1.3631488 sec  
RG 175.97  
DW 20.800 usec  
DE 6.50 usec  
TE 305.4 K  
D1 2.00000000 sec  
D11 0.03000000 sec  
TD0 1  
SFO1 100.6550186 MHz  
NUC1 13C  
PI 10.00 usec  
PLW1 58.22499847 W  
SFO2 400.2596010 MHz  
NUC2 1H  
CPDPRG2 waltz16  
PCPD2 90.00 usec  
PLW2 14.95499992 W  
PLW12 0.41542000 W  
PLW13 0.20895000 W

F2 - Processing parameters  
SI 32768

Fig S6.  $^{13}\text{C}$  NMR of PTH-AB-PY in  $\text{CDCl}_3$  (400 MHz)

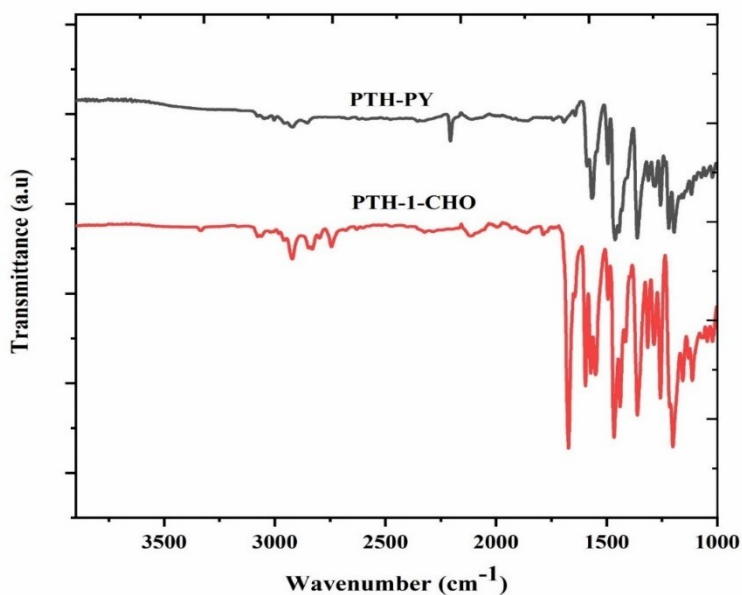

Fig S7. FT-IR spectrum of PTH-AB-PY

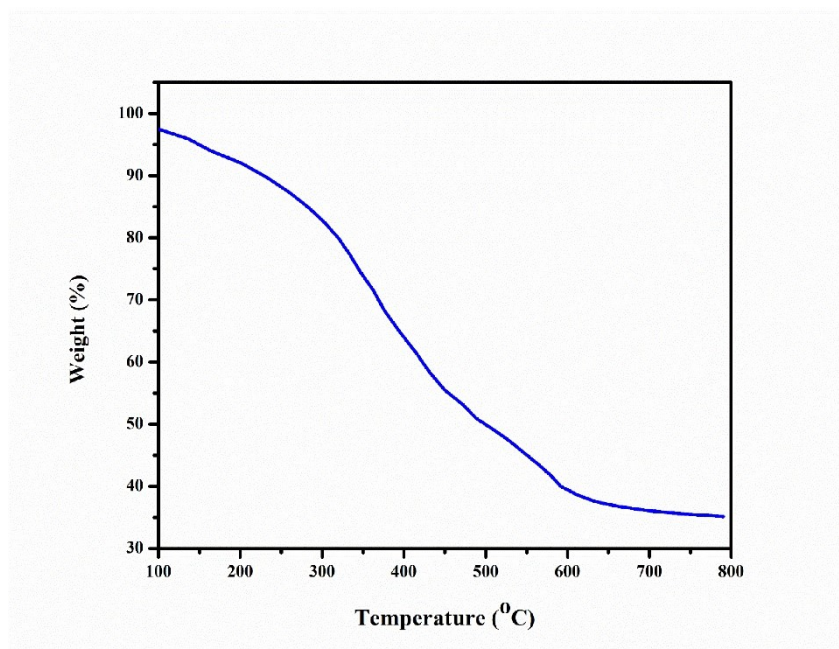

**Fig S8.** TGA data of **PTH-AB-PY**

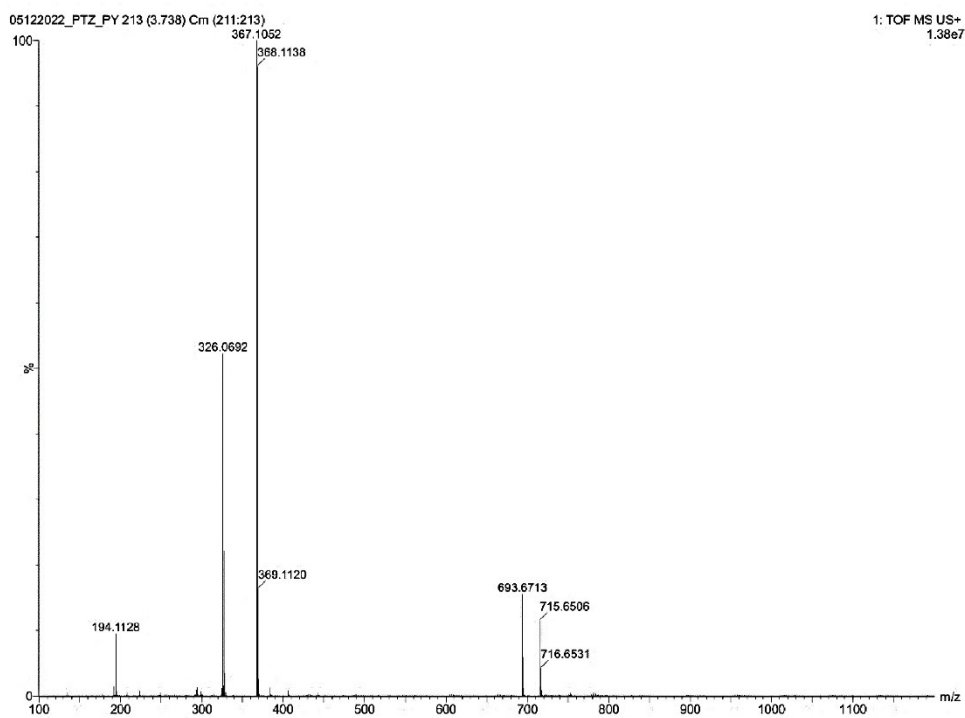

**Fig S9.** HRMS spectrum of PTH-AB-PY

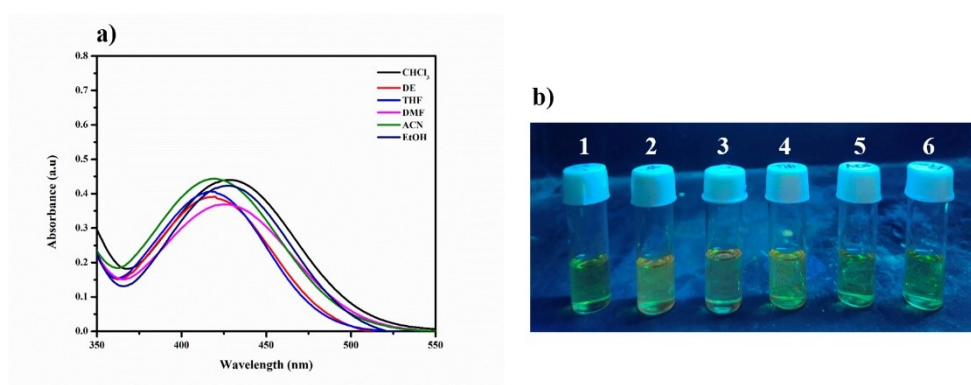

**Fig S10.** (a) Solvent effect of PTH-AB-PY in UV-vis region. (b) Visual changes of PTH-AB-PY in various solvents

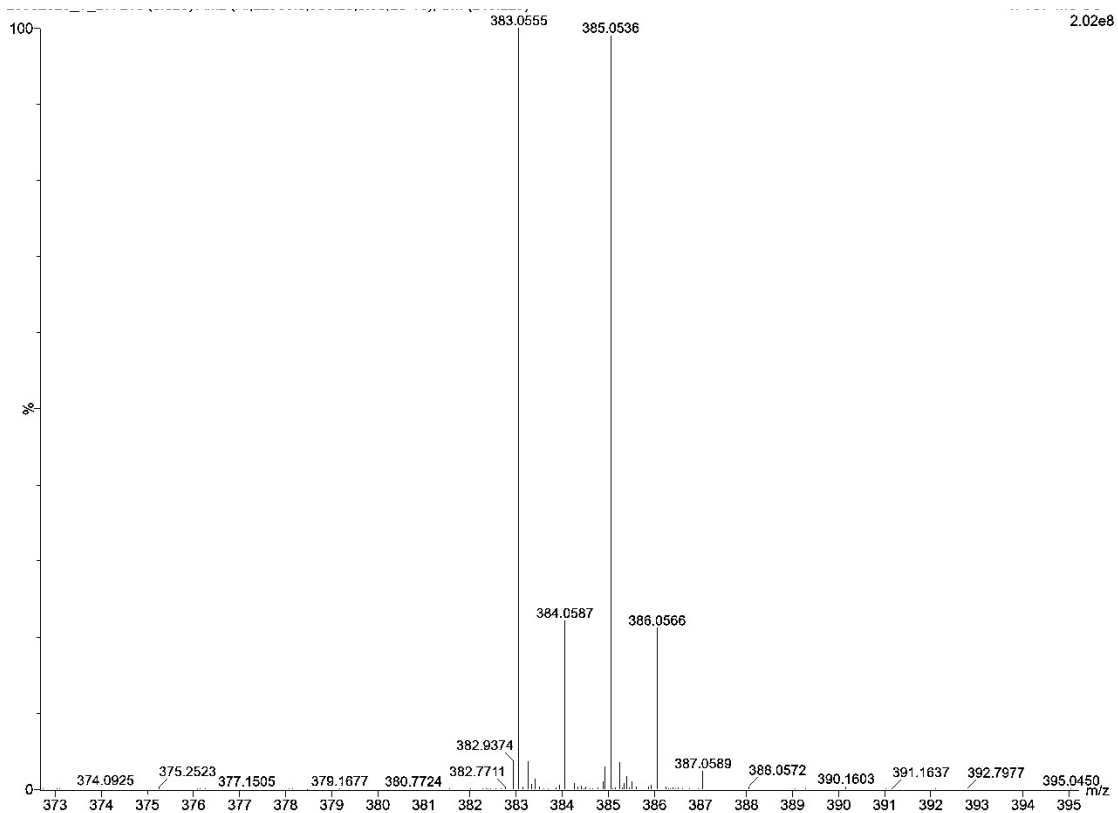

**Fig S11.** HRMS Data of PTH-AB-PY with hypochlorite

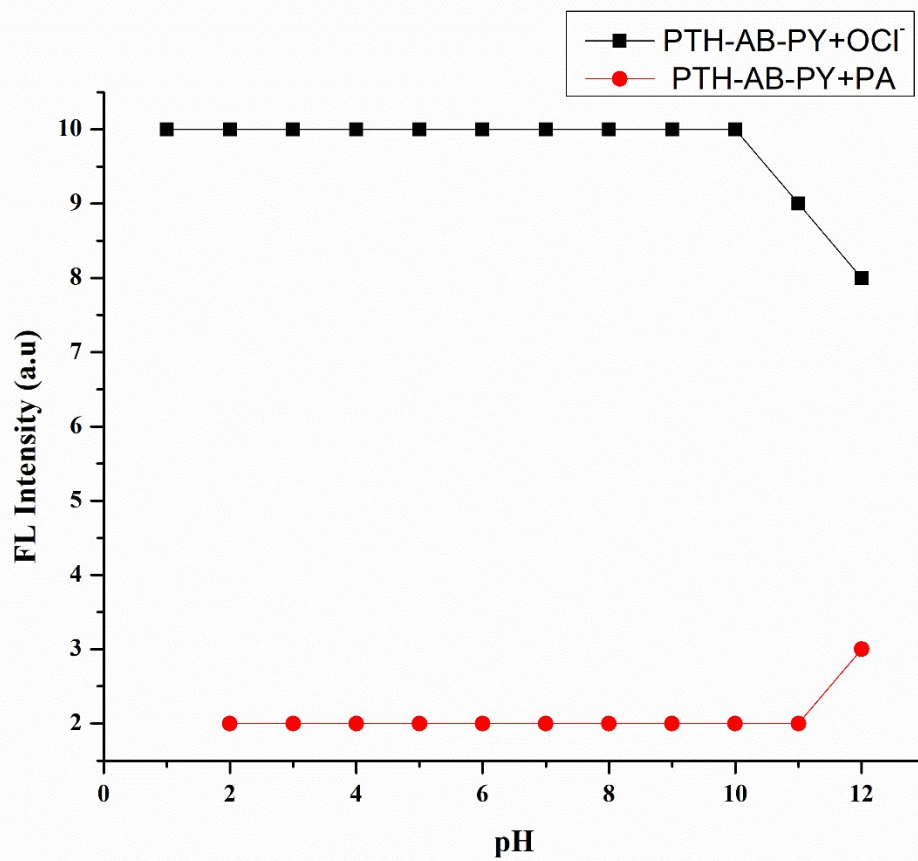

**Fig S12.** pH plot of both hypochlorite and picric acid with PTH-AB-PY



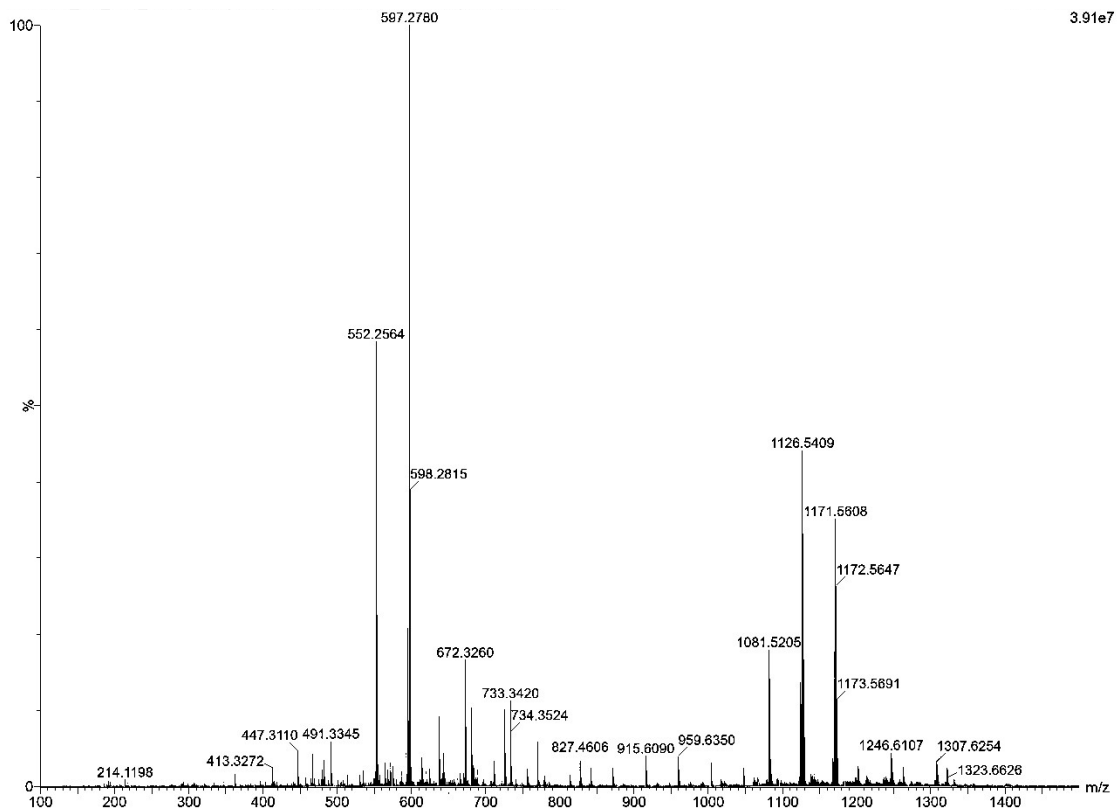

**Fig S13.** HRMS Data of PTH-AB-PY with picric acid

Table S1. The crystallographic data and parameters for the refinement of the PTH-AB-PY

|                            |                                                  |
|----------------------------|--------------------------------------------------|
| Compound                   | PTH-AB-PY                                        |
| CCDC Number                | 2278692                                          |
| Molecular formula          | C <sub>23</sub> H <sub>17</sub> N <sub>3</sub> S |
| Crystal system             | Monoclinic                                       |
| Point group                | P21/n                                            |
| a (Å)                      | 9.3292 (16)                                      |
| b (Å)                      | 14.298 (2)                                       |
| c (Å)                      | 14.191 (3)                                       |
| Temperature (K)            | 300                                              |
| Wavelength (Å)             | 0.71073                                          |
| $\alpha$ (deg)             | 90                                               |
| $\beta$ (deg)              | 96.460(6)                                        |
| $\gamma$ (deg)             | 90                                               |
| V (Å <sup>3</sup> )        | 1880.9(6)                                        |
| Z                          | 4                                                |
| $\mu$ (mm <sup>-1</sup> )  | 0.184                                            |
| Dcalc (g/cm <sup>3</sup> ) | 1.298                                            |
| R1                         | 0.0547                                           |
| wR2                        | 0.1283                                           |

**Table S2. Bond Lengths for PTH-AB-PY**

| Atom | Atom | Length/Å | Atom | Atom | Length/Å |
|------|------|----------|------|------|----------|
| S1   | C11  | 1.756(2) | C9   | C1   | 1.446(3) |
| S1   | C23  | 1.756(2) | C9   | C14  | 1.396(3) |
| N3   | C12  | 1.401(2) | C23  | C18  | 1.391(3) |
| N3   | C18  | 1.417(2) | C23  | C22  | 1.384(3) |
| N3   | C15  | 1.465(2) | C4   | C5   | 1.384(3) |
| N1   | C4   | 1.332(2) | C18  | C19  | 1.394(3) |
| N1   | C8   | 1.326(3) | C16  | C15  | 1.498(3) |
| C12  | C11  | 1.401(3) | C16  | C17  | 1.294(3) |
| C12  | C13  | 1.392(3) | C19  | C20  | 1.379(3) |
| C11  | C10  | 1.376(3) | C3   | N2   | 1.146(3) |
| C13  | C14  | 1.375(3) | C22  | C21  | 1.376(3) |
| C2   | C1   | 1.349(3) | C21  | C20  | 1.369(3) |
| C2   | C4   | 1.479(3) | C5   | C6   | 1.366(3) |
| C2   | C3   | 1.432(3) | C7   | C8   | 1.375(3) |
| C9   | C10  | 1.398(3) | C7   | C6   | 1.365(3) |

**Table S3. Bond Angles for PTH-AB-PY**

| Atom | Atom | Atom | Angle/°    |  | Atom | Atom | Atom | Angle/°    |
|------|------|------|------------|--|------|------|------|------------|
| C23  | S1   | C11  | 100.15(9)  |  | C22  | C23  | C18  | 120.83(19) |
| C12  | N3   | C18  | 121.40(16) |  | C2   | C1   | C9   | 132.66(19) |
| C12  | N3   | C15  | 118.71(16) |  | N1   | C4   | C2   | 116.38(17) |
| C18  | N3   | C15  | 118.87(16) |  | N1   | C4   | C5   | 121.62(19) |
| C8   | N1   | C4   | 117.74(18) |  | C5   | C4   | C2   | 121.94(19) |
| C11  | C12  | N3   | 120.66(17) |  | C23  | C18  | N3   | 120.94(18) |
| C13  | C12  | N3   | 121.59(17) |  | C23  | C18  | C19  | 117.79(19) |
| C13  | C12  | C11  | 117.74(18) |  | C19  | C18  | N3   | 121.27(19) |
| C12  | C11  | S1   | 120.24(15) |  | C13  | C14  | C9   | 122.24(19) |
| C10  | C11  | S1   | 118.32(14) |  | C17  | C16  | C15  | 126.7(2)   |
| C10  | C11  | C12  | 121.07(18) |  | N3   | C15  | C16  | 116.97(18) |
| C14  | C13  | C12  | 120.69(18) |  | C20  | C19  | C18  | 120.6(2)   |
| C1   | C2   | C4   | 122.00(18) |  | N2   | C3   | C2   | 177.2(2)   |
| C1   | C2   | C3   | 122.33(19) |  | C21  | C22  | C23  | 120.5(2)   |
| C3   | C2   | C4   | 115.59(17) |  | C20  | C21  | C22  | 119.1(2)   |
| C10  | C9   | C1   | 125.86(18) |  | C6   | C5   | C4   | 119.2(2)   |
| C14  | C9   | C10  | 116.70(18) |  | C21  | C20  | C19  | 121.1(2)   |
| C14  | C9   | C1   | 117.42(18) |  | C6   | C7   | C8   | 117.3(2)   |
| C11  | C10  | C9   | 121.52(17) |  | N1   | C8   | C7   | 124.2(2)   |
| C18  | C23  | S1   | 120.29(16) |  | C7   | C6   | C5   | 119.8(2)   |
| C22  | C23  | S1   | 118.78(16) |  |      |      |      |            |

**Table S4: Comparison of previously reported phenothiazine probe**

| S. No | Probe            | Test media                      | Operation mode | LOD (M)                | Response time (s) | Ref       |
|-------|------------------|---------------------------------|----------------|------------------------|-------------------|-----------|
| 1     | ERC-Ctrl         | ACN : H <sub>2</sub> O = 3 : 7  | Ratiometric    | $0.44 \times 10^{-4}$  | 6                 | 37        |
| 2     | CPD              | DMSO : H <sub>2</sub> O = 1 : 5 | Ratiometric    | $0.012 \times 10^{-4}$ | 10                | 38        |
| 3     | <b>PTH-AB-PY</b> | ACN : H <sub>2</sub> O = 1:1    | Ratiometric    | $6.8 \times 10^{-4}$   | 3                 | This work |

**Table S5: Results for the Detection of ClO<sup>-</sup> in water samples**

| Analyte      | Water samples | Spiked level (M)      | Found level (M)       | Recovery (%) |
|--------------|---------------|-----------------------|-----------------------|--------------|
| Hypochlorite | River water   | $2.00 \times 10^{-4}$ | $1.98 \times 10^{-4}$ | 99           |
|              |               | $4.00 \times 10^{-4}$ | $3.97 \times 10^{-4}$ | 99.2         |
|              |               | $2.00 \times 10^{-4}$ | $1.99 \times 10^{-4}$ | 99.5         |
| Picric acid  | Tap water     | $4.00 \times 10^{-4}$ | $3.92 \times 10^{-4}$ | 98           |
|              |               | $2.00 \times 10^{-4}$ | $2.01 \times 10^{-4}$ | 100          |
|              |               | $4.00 \times 10^{-4}$ | $3.8 \times 10^{-4}$  | 95           |
| Picric acid  | River water   | $2.00 \times 10^{-4}$ | $1.98 \times 10^{-4}$ | 99           |
|              |               | $4.00 \times 10^{-4}$ | $3.86 \times 10^{-4}$ | 96.5         |
|              |               | $2.00 \times 10^{-4}$ | $1.98 \times 10^{-4}$ | 99           |

**Table S6: Results for the Detection of ClO<sup>-</sup> in Vegetable Samples**

| Analyte      | Water samples | Spiked level (M)      | Found level (M)       | Recovery (%) |
|--------------|---------------|-----------------------|-----------------------|--------------|
| Hypochlorite | Tomato        | $3.00 \times 10^{-4}$ | $3.00 \times 10^{-4}$ | 100          |
|              | Carrot        | $3.00 \times 10^{-4}$ | $2.9 \times 10^{-4}$  | 96.6         |
|              | Tomato        | $3.00 \times 10^{-4}$ | $2.8 \times 10^{-4}$  | 93.33        |
| Picric acid  | Carrot        | $3.00 \times 10^{-4}$ | $2.98 \times 10^{-4}$ | 99.33        |
